# Supplementary material for: The Modifying Role of Socioeconomic Position and Greenness on the Short-Term Effect of Heat and Air Pollution on Preterm Births in Rome, 2001–2013
Source: PubMed Central journal article supplement (PMC6678295; doi:10.3390/ijerph16142497), 2019-07-12
Supplement: ijerph-16-02497-s001.pdf [file ijerph-16-02497-s001.pdf]

**Table S1.** Pearson's Correlation coefficients among the studied exposures.

|                                         | Daily maximum apparent temperature (°C) | PM <sub>10</sub> (µg/m <sup>3</sup> ) | Ozone (µg/m <sup>3</sup> ) | NO <sub>2</sub> (µg/m <sup>3</sup> ) |
|-----------------------------------------|-----------------------------------------|---------------------------------------|----------------------------|--------------------------------------|
| Daily maximum apparent temperature (°C) | 1                                       |                                       |                            |                                      |
| PM <sub>10</sub> (µg/m <sup>3</sup> )   | 0.27                                    | 1                                     |                            |                                      |
| Ozone (µg/m <sup>3</sup> )              | 0.56                                    | 0.11                                  | 1                          |                                      |
| NO <sub>2</sub> (µg/m <sup>3</sup> )    | -0.12                                   | 0.48                                  | -0.09                      | 1                                    |

**Table S2.** Poisson regression estimated percent change in daily number of preterm births by 1°C increase of MAT (Lag 0-2) for residential proximity to green spaces and SEP; Rome, 2001-2013.

| daily MAT (Lag 0-2)                   |                    | SEP                   |                      |                      |
|---------------------------------------|--------------------|-----------------------|----------------------|----------------------|
|                                       |                    | High                  | Medium               | Low                  |
| Residential proximity to green spaces | within 100m        | 2.20<br>(0.22;4.21)   | 2.60<br>(-0.19;5.51) | 5.28<br>(2.97;7.65)  |
|                                       | between 100 - 500m | 1.10<br>(-0.23;2.44)  | 2.60<br>(0.79;4.44)  | 2.57<br>(1.10;4.05)  |
|                                       | beyond 500m        | -0.10<br>(-1.72;1.69) | 2.11<br>(0.13;4.13)  | 1.27<br>(-0.31;2.87) |

**Table S3.** Poisson regression estimated percent change in daily number of preterm births by 1 °C increase of MAT (Lag 0-2) for residential proximity to green spaces and maternal age; Rome, 2001-2013.

| daily MAT (Lag 0-2)                   |                    | Maternal Age         |                     |                       |
|---------------------------------------|--------------------|----------------------|---------------------|-----------------------|
|                                       |                    | <30 yrs              | 30-36 yrs           | >=37 yrs              |
| Residential proximity to green spaces | within 100m        | 3.12<br>(0.55;5.76)  | 4.42<br>(2.47;6.42) | 1.30<br>(-1.23;3.90)  |
|                                       | between 100 - 500m | 3.12<br>(1.38;4.89)  | 1.65<br>(0.35;2.98) | 1.38<br>(-0.17;2.95)  |
|                                       | beyond 500m        | 1.97<br>(-0.02;4.00) | 1.53<br>(0.03;3.07) | -0.57<br>(-2.38;1.27) |
